# Supplementary material
Source: PubMed Central journal article supplement (PMC9451120)
Supplement: 41390_2022_2293_MOESM1_ESM.pdf [file 41390_2022_2293_MOESM1_ESM.pdf]

| <b>Supplementary Table 1. Comparison of CT values across the three assays*</b> |                        |                        |
|--------------------------------------------------------------------------------|------------------------|------------------------|
| <b>S<sup>1</sup></b>                                                           | <b>U<sup>2</sup></b>   | <b>P<sup>3</sup></b>   |
| 27.9                                                                           | 29.0                   | 28.3                   |
| 12.9                                                                           | 13.3                   | 14.1                   |
| 13.3                                                                           | 14.5                   | 17.6                   |
| 13.9                                                                           | 14.3                   | 14.6                   |
| 14.3                                                                           | 16.6                   | 15.9                   |
| 15.1                                                                           | 17.9                   | 15.6                   |
| 13.7                                                                           | 15.4                   | 14.1                   |
| 13.6                                                                           | 15.5                   | 14.2                   |
| 14.7                                                                           | 16.7                   | 15.1                   |
| 17.1                                                                           | 16.4                   | 15.5                   |
| Mean ± SD = 15.7 ± 4.5                                                         | Mean ± SD = 16.9 ± 4.4 | Mean ± SD = 16.5 ± 4.3 |
| Repeated measures ANOVA (p-value) = 0.023                                      |                        |                        |

\*CT values are calculated as the average of the CTs of the different target genes.

<sup>1</sup>Allplex™ SARS-CoV2 assay (Seegene, Seoul, South Korea)

<sup>2</sup>Cepheid GeneXpert Xpress SARS-CoV-2

<sup>3</sup>Simplexa Covid-19 direct assay on LIAISON® MDX (DiaSorin Molecular, CA, USA)
